# Supplementary material for: Behavioral Phenotyping of Bbs6 and Bbs8 Knockout Mice Reveals Major Alterations in Communication and Anxiety
Source: MDPI journal article supplement (doi:10.3390/ijms232314506), 2022-11-22
Supplement: s1 [file s1]

**Table S1.** Composition of groups of investigated mice (F2 generation).

Male Bbs8 +/- mice were crossed with BALB/canNRj female mice. Offspring was genotyped for albinism caused by tyr gene mutation and for knockout of the Bbs8 gene.

| Bbs8-genotype | Albino-genotype | $\text{tyr}^G/\text{tyr}^G$ |      |       |      | $\text{tyr}^C/\text{tyr}^C$ |   | $\text{tyr}^G/\text{tyr}^C$ |      |       |      |
|---------------|-----------------|-----------------------------|------|-------|------|-----------------------------|---|-----------------------------|------|-------|------|
| <b>(+/+)</b>  | #animals        | <b>6</b>                    |      |       |      | <b>5</b>                    |   | <b>11</b>                   |      |       |      |
|               | sex             | ♂                           |      | ♀     |      | ♂                           | ♀ | ♂                           |      | ♀     |      |
|               |                 | 3                           |      | 3     |      | 3                           | 2 | 5                           |      | 6     |      |
|               | fur color       | brown                       | grey | brown | grey | white                       |   | brown                       | grey | brown | grey |
|               |                 |                             | 3    | 1     | 2    | 5                           |   | 1                           | 4    | 4     | 2    |
| <b>(-/-)</b>  | #animals        | <b>6</b>                    |      |       |      | <b>5</b>                    |   | <b>11</b>                   |      |       |      |
|               | sex             | ♂                           |      | ♀     |      | ♂                           | ♀ | ♂                           |      | ♀     |      |
|               |                 | 4                           |      | 2     |      | 2                           | 3 | 5                           |      | 6     |      |
|               | fur color       | brown                       | grey | brown | grey | white                       |   | brown                       | grey | brown | grey |
|               |                 | 2                           | 2    | 0     | 2    | 5                           |   | 1                           | 4    | 2     | 4    |

**Table S2.** Time course of behavioral tests

Animals were housed as groups of 4 up to end of week 2, then they were single-caged.

|             | Week 1                                  | Week 2                                           | Week 3                                                      | Week 4                                               |
|-------------|-----------------------------------------|--------------------------------------------------|-------------------------------------------------------------|------------------------------------------------------|
| <b>a.m.</b> | Tube test<br>SI test                    | Marble burying test<br>T Maze test               | USV recording<br>Urine scent marking test<br>Olfaction test | Olfaction test<br>Pasta gnawing test<br>Nesting test |
| <b>p.m.</b> | Huddling test<br>Neophobia test<br>RAWM | Open field test<br>NISO test<br>Forced swim test | Pole test<br>Nesting test                                   | Pasta gnawing test                                   |

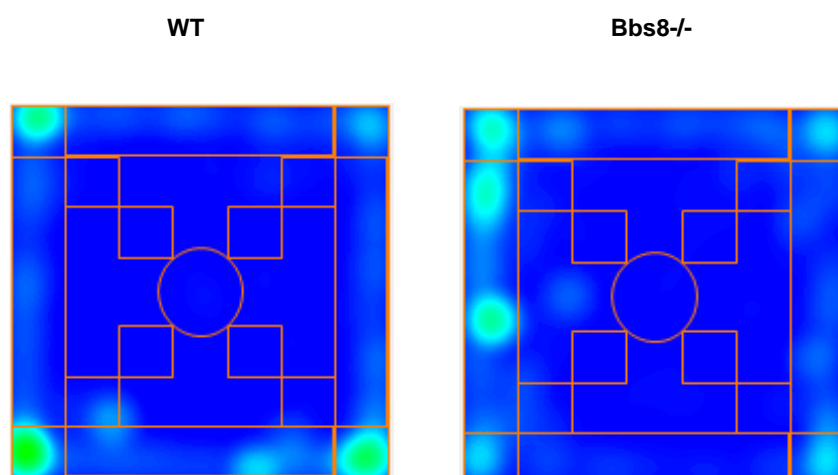

**Figure S1. Examples of heat maps for movement profile visualization.** A heat map reporting on the localization of an exemplary wild type and a Bbs knockout mouse is shown. The wild type animal stayed for longer periods in the corners, while the Bbs8 animal showed a more spread pattern of localization.
